# Supplementary material
Source: PubMed Central journal article supplement (PMC8276089)
Supplement: NIHMS1543008-supplement-2.pdf [file NIHMS1543008-supplement-2.pdf]

## **Supplemental Information for “Recovery of the gut microbiota after antibiotics depends on host diet and environmental reservoirs”**

### **Authors**

Katharine Michelle Ng<sup>1</sup>, Andrés Aranda-Diaz<sup>1</sup>, Carolina Tropini<sup>2</sup>, Matthew Ryan Frankel<sup>1</sup>, William Winter Van Treuren<sup>2</sup>, Colleen O’Laughlin<sup>1</sup>, Bryan Douglas Merrill<sup>2</sup>, Feiqiao Brian Yu<sup>3</sup>, Kali Meredith Pruss<sup>2</sup>, Rita Almeida Oliveira<sup>4</sup>, Steven Kyle Higginbottom<sup>2</sup>, Norma F. Neff<sup>3</sup>, Michael Andrew Fischbach<sup>1,3</sup>, Karina Bivar Xavier<sup>4</sup>, Justin Laine Sonnenburg<sup>2,3</sup>, Kerwyn Casey Huang<sup>1,2,3,\*</sup>

### **Affiliations**

<sup>1</sup>Department of Bioengineering, Stanford University School of Medicine, Stanford, CA 94305, USA

<sup>2</sup>Department of Microbiology & Immunology, Stanford University School of Medicine, Stanford, CA 94305, USA

<sup>3</sup>Chan Zuckerberg Biohub, San Francisco, CA 94158

<sup>4</sup>Instituto Gulbenkian de Ciência, Oeiras, Portugal

\*Corresponding author: [kchuang@stanford.edu](mailto:kchuang@stanford.edu)

Lead author: Kerwyn Casey Huang ([kchuang@stanford.edu](mailto:kchuang@stanford.edu))

## Methods

### Supplemental Figure Legends

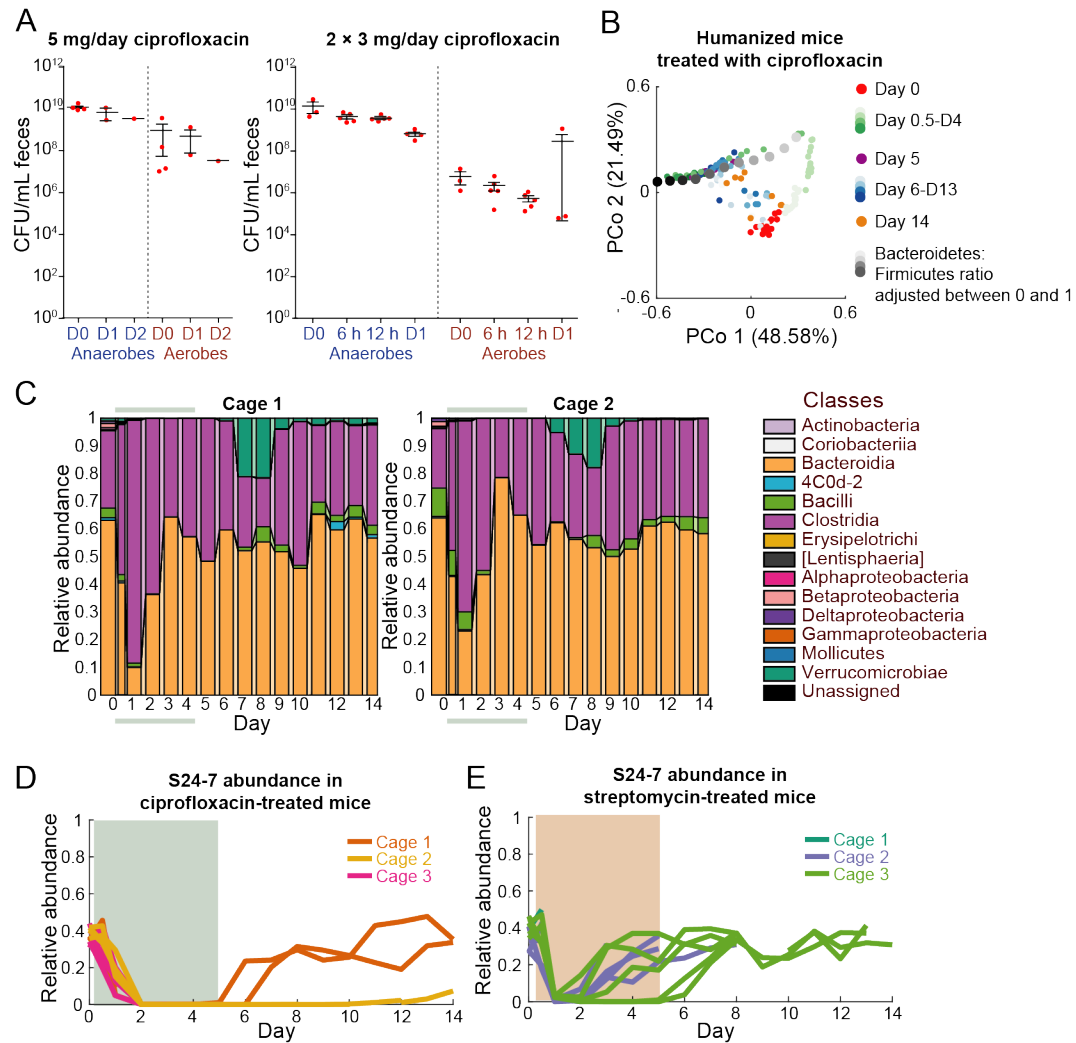

**Figure S1: Analyses of streptomycin- and ciprofloxacin-treated mice, related to**

### Figure 1.

- A) Culturable bacterial densities in feces of mice treated with 5 mg ciprofloxacin/day or 3 mg twice daily revealed a larger effect with twice daily gavaging.

- B) Computational adjustment of the Bacteroidetes:Firmicutes ratio through global rescaling of the fractional abundances of each phylum resulted in movement along principal coordinate 1.
- C) Class-level community composition in feces in two cages of ciprofloxacin-treated humanized mice demonstrates insufficiency of class-level analyses to detect cage-specific differences in composition.
- D,E) Relative abundance of S24-7 during (D) ciprofloxacin and (E) streptomycin treatment of humanized mice.

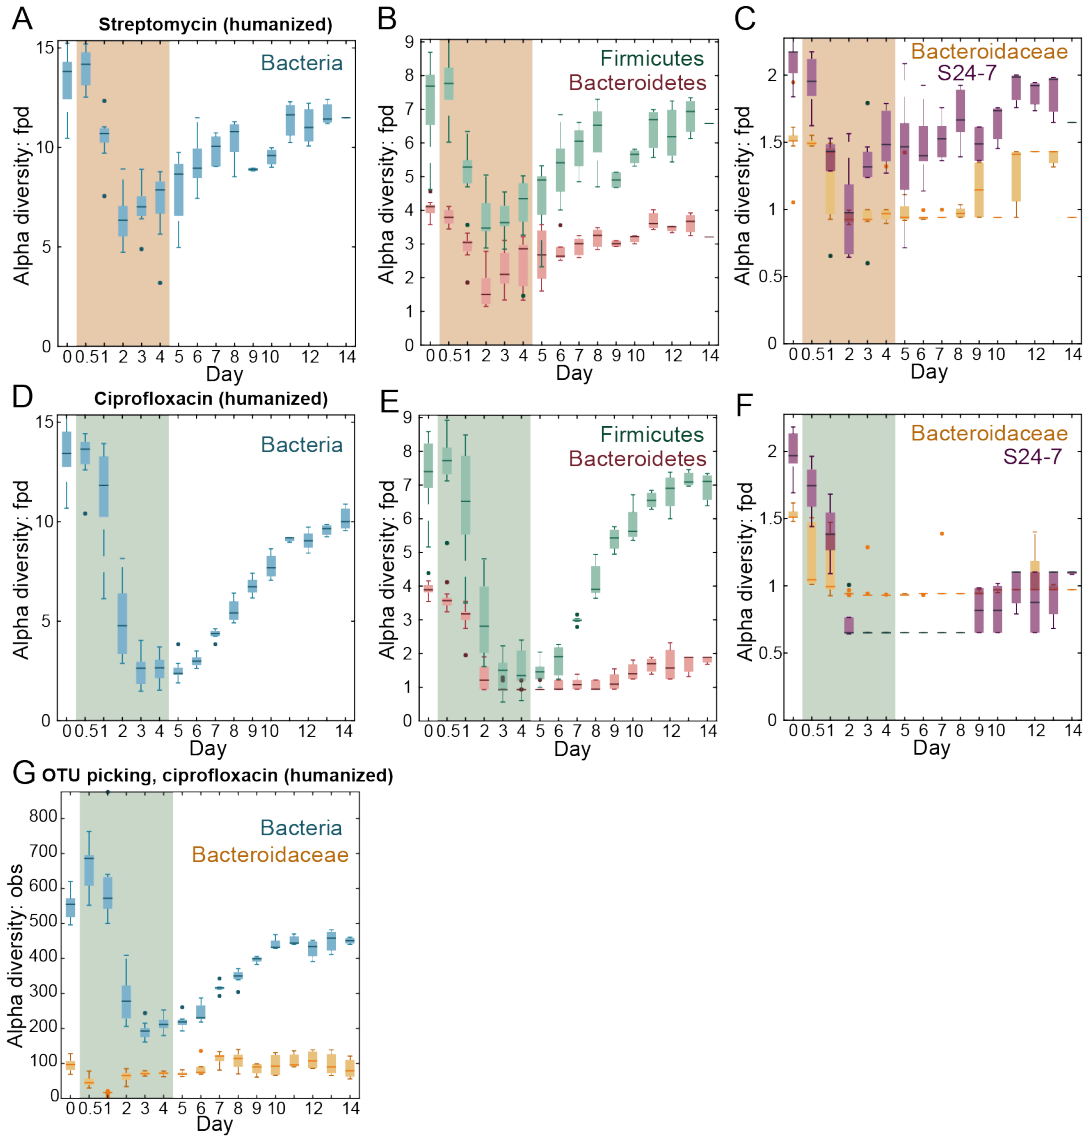

**Figure S2: Diversity analyses at different taxonomic levels for streptomycin- and ciprofloxacin-treated humanized mice, related to Figure 2.**

A,D) Alpha diversity (Faith's PD) of all bacteria in (A) streptomycin-treated humanized mice and (D) ciprofloxacin-treated humanized mice. Antibiotic treatment period marked in colored area.

B,E) Alpha diversity (Faith's PD) of phyla Firmicutes (green) and Bacteroidetes (pink) in (B) streptomycin-treated humanized mice and (E) ciprofloxacin-treated humanized mice. Antibiotic treatment period marked in colored area.

C,F) Alpha diversity (Faith's PD) of families S24-7 (purple) and Bacteroidaceae (yellow) in (C) streptomycin-treated humanized mice and (F) ciprofloxacin-treated humanized mice. Antibiotic treatment period marked in colored area.

G) Alpha diversity (observed ASVs) of ciprofloxacin-treated humanized mice calculated using *de novo* OTU-picking instead of DADA2.

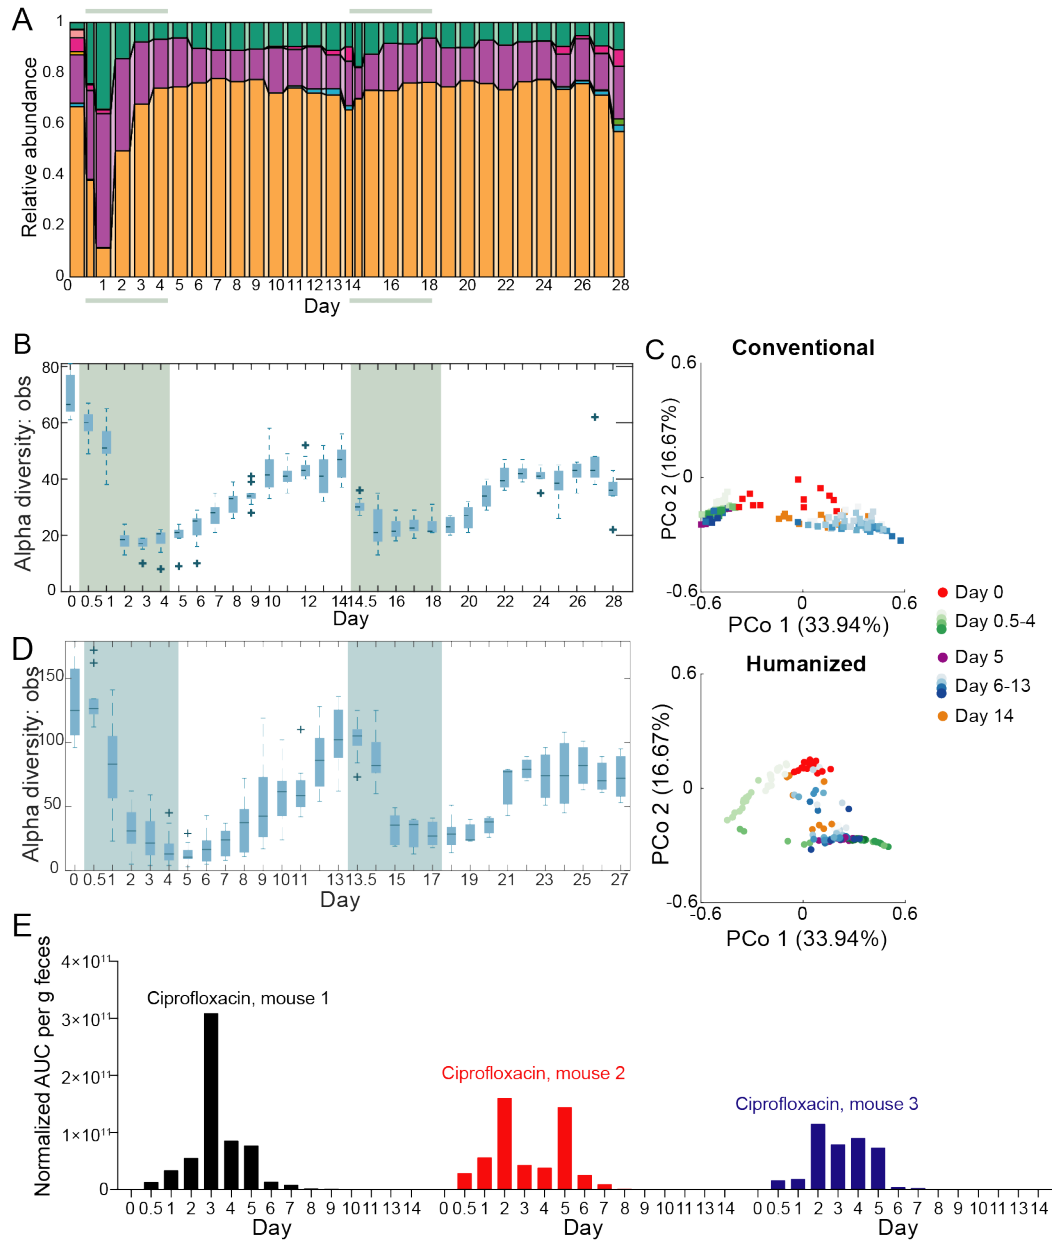

**Figure S3: Comparisons of humanized and conventional mice during double treatment with ciprofloxacin, and mass spectrometry analyses of ciprofloxacin-treated mice, related to Figure 3.**

A) Class-level community composition in feces of humanized mice further demonstrated the robustness of humanized mice to the second treatment.

- B,D) Alpha diversity (observed ASVs) of all bacteria in (B) humanized and (D) conventional mice. The diversity decreased less in the humanized population during the second treatment than during the first.
- C) Principal coordinates analyses (PCoA) of community composition in conventional and humanized mice during ciprofloxacin treatment reveal a conserved trajectory. Analyses used weighted UniFrac distances (Methods).
- E) Normalized concentrations of ciprofloxacin in feces of conventional mice treated with ciprofloxacin.

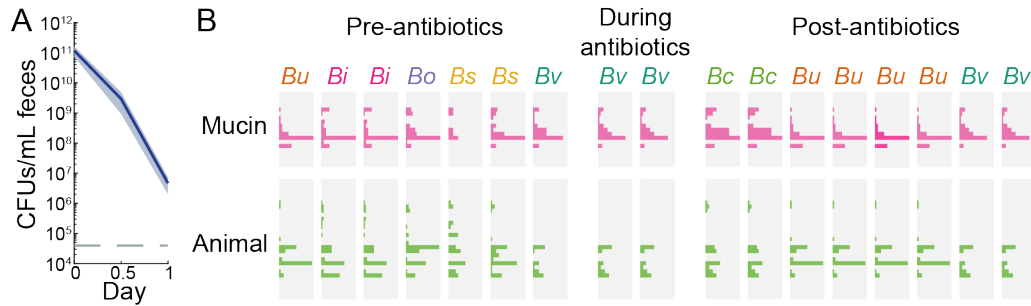

**Figure S4: Culturable loads decrease during streptomycin treatment in gnotobiotic mice monocolonized with *Bacteroides thetaiotaomicron*, and glycoside hydrolase abundances vary across *Bacteroides* spp., related to Figures 1, 3, and 4.**

- A) Culturable anaerobic fecal densities in ex-germ-free mice ( $n = 10$ ) colonized with *B. thetaiotaomicron* for 2 weeks prior to treatment with 20 mg streptomycin on day 0 and day 1. Bacterial loads collapsed as in humanized mice (Fig. 1B). Error bars: standard error of the mean.
- B) Presence of carbohydrate active enzymes in *Bacteroides* spp. isolated from humanized mice. Mucin enzymes were over-represented in *Bc* post-antibiotics. *Bu*: *B. uniformis*; *Bi*: *B. intestinalis*; *Bo*: *B. ovatus*; *Bs*: *B. salyersiae*; *Bv*: *B. vulgatus*; *Bc*: *B. caccae*.



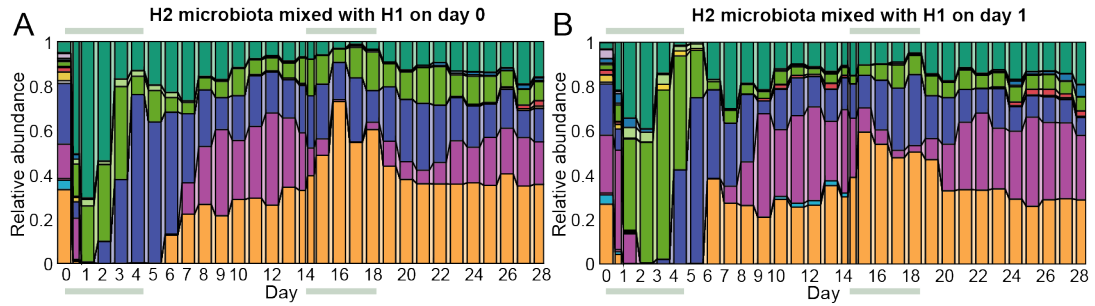

**Figure S5: Analyses of microbiota dynamics and trajectories during cross-housing and cohousing experiments, related to Figure 6.**

A,B) Family-level community composition in feces of H2 mice mixed with H1 mice on (A) day 0 and (B) day 1.

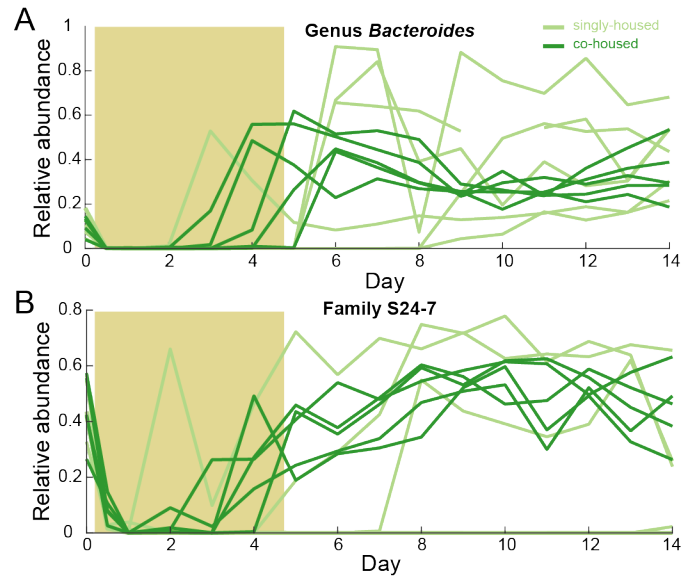

**Figure S6: Trajectories of Bacteroidetes taxonomic classes in singly housed and co-housed conventionalized mice, related to Figure 7.**

A,B) Relative abundance of the (A) *Bacteroides* genus and (B) S24-7 family in singly- and co-housed conventional mice. Antibiotic treatment period is denoted by colored rectangle. Recovery of both families is more heterogeneous in singly housed mice.

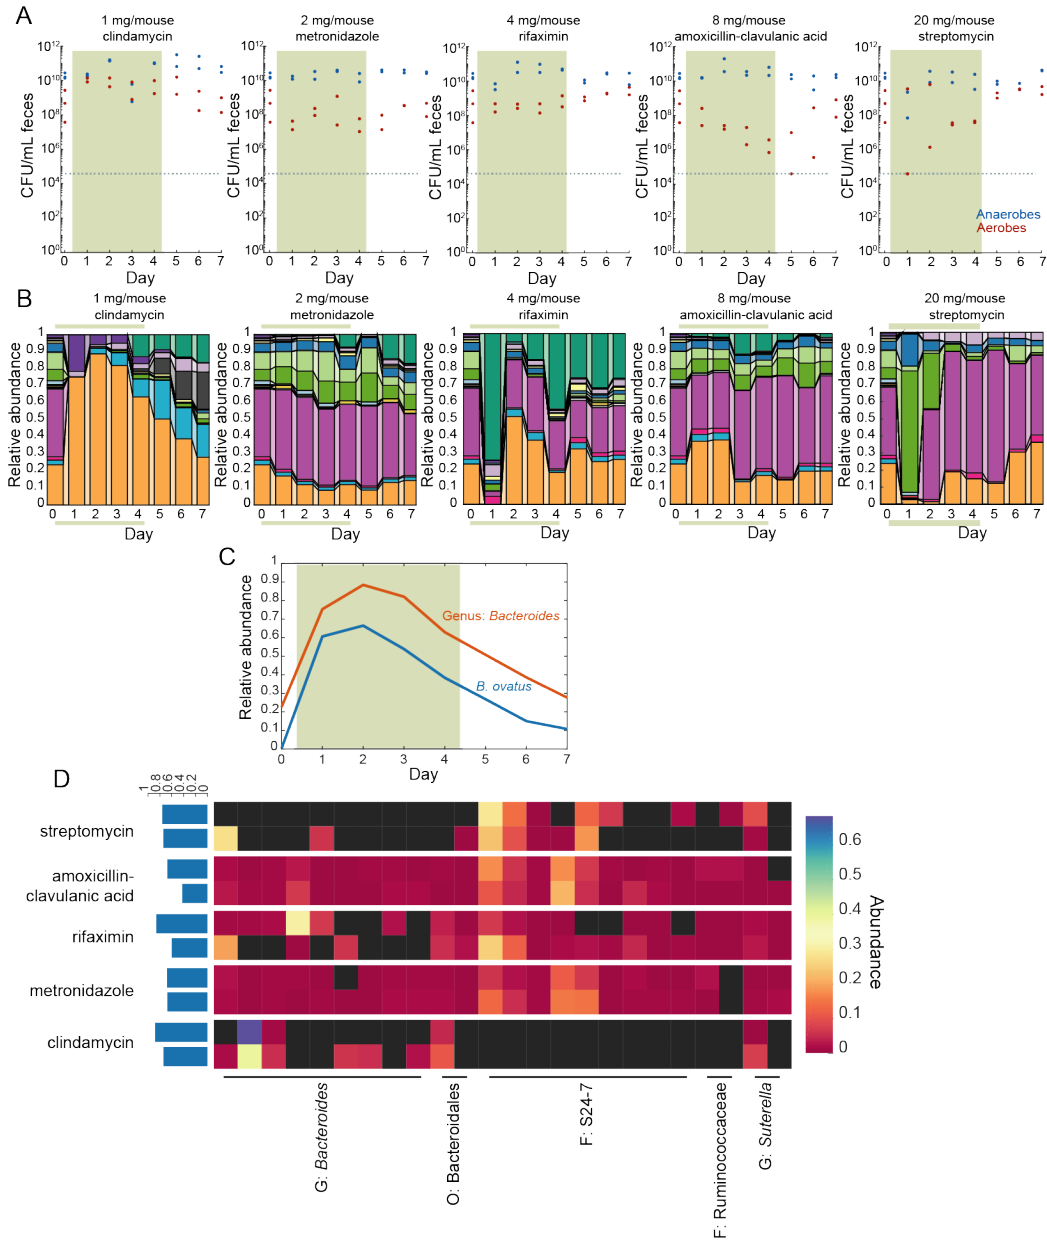

**Figure S7: Response of humanized mice to a wide range of antibiotics, related to Figure 5.**

- A) Culturable anaerobic (blue) and aerobic (red) fecal densities in humanized mice gavaged with antibiotics for 5 days.
- B) Family-level community composition in feces of mice in (A).

- C) Relative abundance of a *B. ovatus* ASV and the genus *Bacteroides* in clindamycin-treated mice reveals domination of *B. ovatus*.
- D) A conserved core microbiota of 24 species is observed in the 10 non-ciprofloxacin treated mice across antibiotics, largely composed of *Bacteroides* and S24-7 species.

| Source       | Species                                        | Mouse | Day | MIC   |       | ResFinder               |
|--------------|------------------------------------------------|-------|-----|-------|-------|-------------------------|
|              |                                                |       |     | cipro | strep |                         |
| Humanized    | <i>Bacteroides vulgatus</i>                    | 1     | 0   | 8     | >512  | none                    |
| Humanized    | <i>Bacteroides vulgatus</i>                    | 1     | 4   | 512   | >512  | <i>ermB, cfxA, tetQ</i> |
| Humanized    | <i>Bacteroides vulgatus</i>                    | 1     | 12  | 512   | >512  | <i>ermB, cfxA, tetQ</i> |
| Humanized    | <i>Bacteroides caccae</i>                      | 1     | 12  | 64    | >512  | <i>tetQ, ermF</i>       |
| Humanized    | <i>Bacteroides vulgatus</i>                    | 1     | 16  | 512   | >512  | <i>cfxA, tetQ</i>       |
| Humanized    | <i>Bacteroides salyersiae</i>                  | 2     | 0   | 4     | >512  | none                    |
| Humanized    | <i>Bacteroides stercoris</i>                   | 2     | 0   | 8     | >512  | <i>tetQ</i>             |
| Humanized    | <i>Bacteroides xylanisolvens</i>               | 2     | 0   | 8     | N.D.  | <i>tetQ</i>             |
| Humanized    | <i>Bacteroides intestinalis</i>                | 2     | 0   | 2     | >512  | none                    |
| Humanized    | <i>Bacteroides intestinalis</i>                | 2     | 0   | 4     | >512  | none                    |
| Humanized    | <i>Bacteroides uniformis</i>                   | 2     | 0   | 16    | N.D.  | <i>tetQ</i>             |
| Humanized    | <i>Bacteroides uniformis</i>                   | 2     | 10  | 64    | >512  | <i>tetQ</i>             |
| Humanized    | <i>Bacteroides uniformis</i>                   | 2     | 10  | 64    | 16    | <i>tetQ</i>             |
| Humanized    | <i>Bacteroides vulgatus</i>                    | 2     | 16  | >512  | >512  | <i>ermB, cfxA, tetQ</i> |
| Humanized    | <i>Bacteroides caccae</i>                      | 2     | 22  | 64    | >512  | <i>tetQ, ermF</i>       |
| Humanized    | <i>Bacteroides uniformis</i>                   | 2     | 22  | 64    | >512  | <i>tetQ</i>             |
| Humanized    | <i>Bacteroides uniformis</i>                   | 2     | 22  | 64    | N.D.  | <i>tetQ</i>             |
| Conventional | <i>Bacteroides vulgatus</i>                    | 1     | 0   | 4     | >512  | none                    |
| Conventional | <i>Bacteroides vulgatus</i>                    | 1     | 0   | 8     | >512  | none                    |
| Conventional | <i>Bacteroides acidifaciens</i>                | 1     | 0   | 2     | N.D.  | none                    |
| Conventional | <i>Bacteroides uniformis</i>                   | 1     | 0   | 4     | 1     | <i>tetQ</i>             |
| Conventional | <i>Bacteroides vulgatus</i>                    | 1     | 11  | 4     | >512  | none                    |
| Conventional | <i>Bacteroides acidifaciens</i>                | 1     | 11  | 4     | 1     | none                    |
| Conventional | <i>Bacteroides uniformis</i>                   | 1     | 11  | 4     | N.D.  | <i>tetQ</i>             |
| Humanized H2 | <i>Bacteroides</i> sp. D1                      | E1.1  | 11  | 8     | 16    | <i>cfxA, tetQ</i>       |
| Humanized H2 | <i>Bacteroides</i> sp. D1                      | E1.1  | 11  | 4     | N.D.  | <i>cfxA, tetQ</i>       |
| Humanized H2 | <i>Bacteroides salyersiae</i>                  | E1.1  | 11  | 4     | >512  | none                    |
| HMP          | <i>Bacteroides cellulosilyticus</i> CL02T12C19 |       |     | 8     | N.D.  |                         |
| HMP          | <i>Bacteroides salyersiae</i> CL02T12C01       |       |     | 32    | >512  |                         |
| HMP          | <i>Bacteroides stercoris</i> CC31F             |       |     | 4     | 512   |                         |
| HMP          | <i>Bacteroides vulgatus</i> CL09T03C04         |       |     | 8     | >512  |                         |
| Type strain  | <i>Bacteroides theta</i> VPI5482               |       |     | 4     | 256   |                         |
| Type strain  | <i>Bacteroides fragilis</i> NCTC9343           |       |     | 4     | 512   |                         |
| Type strain  | <i>Bacteroides vulgatus</i> ATCC8482           |       |     | 8     | >512  |                         |
| Type strain  | <i>Bacteroides distasonis</i> ATCC8503         |       |     | 8     | >512  |                         |
| Type strain  | <i>Bacteroides caccae</i> ATCC43185            |       |     | 32    | N.D.  |                         |
| Type strain  | <i>Bacteroides ovatus</i> ATCC8483             |       |     | 8     | 512   |                         |
| Type strain  | <i>Bacteroides uniformis</i> ATCC8492          |       |     | 4     | 256   |                         |
| Type strain  | <i>Bacteroides intestinalis</i> DSM 17393      |       |     | 4     | 256   |                         |

**Table S1: Ciprofloxacin and streptomycin MICs for representative *Bacteroides***

**isolates and type strains, related to Figures 1, 3, and 6.** Columns 3 and 4 contain the

mouse number and day of fecal sample from which the isolate was obtained, where day 0 is

when antibiotic treatment commenced. N.D.: not determined. Table also includes any antibiotic resistance genes detected using ResFinder

(<https://cge.cbs.dtu.dk/services/ResFinder/>).
